# Supplementary material for: An erythrocyte membrane-modified biomimetic synergistic nanosystem for cancer anti-vascular therapy and initial efficacy monitoring
Source: Royal Society of Chemistry journal article supplement (doi:10.1039/d3tb00807j), 2023-01-01
Supplement: d3tb00807j1.pdf [file d3tb00807j1.pdf]

## Supplementary Information

### **Erythrocyte membrane-modified biomimetic synergistic nanosystem for cancer anti-vascular therapy and initial efficacy monitoring**

Jieying Zhang,<sup>a</sup> Fang Li,<sup>a</sup> Lili Su,<sup>b</sup> Qian Hu,<sup>a</sup> Jianfeng Li<sup>\*b</sup> and Xingjun Zhu<sup>\*a</sup>

<sup>a</sup> School of Physical Science and Technology, ShanghaiTech University, 393 Huaxia Road, Shanghai, 201210, P. R. China.

E-mail: zhuxj1@shanghaitech.edu.cn

<sup>b</sup> Gene Editing Center, School of Life Science and Technology, ShanghaiTech University, 393 Huaxia Road, Shanghai, 201210, P. R. China.

E-mail: lijf1@shanghaitech.edu.cn

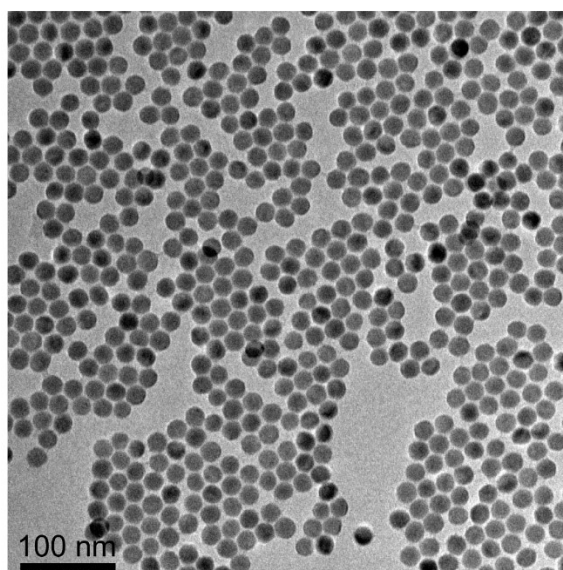

**Figure S1.** Transmission electron microscope (TEM) images of NaYF<sub>4</sub>:Yb,Er nanoparticles.

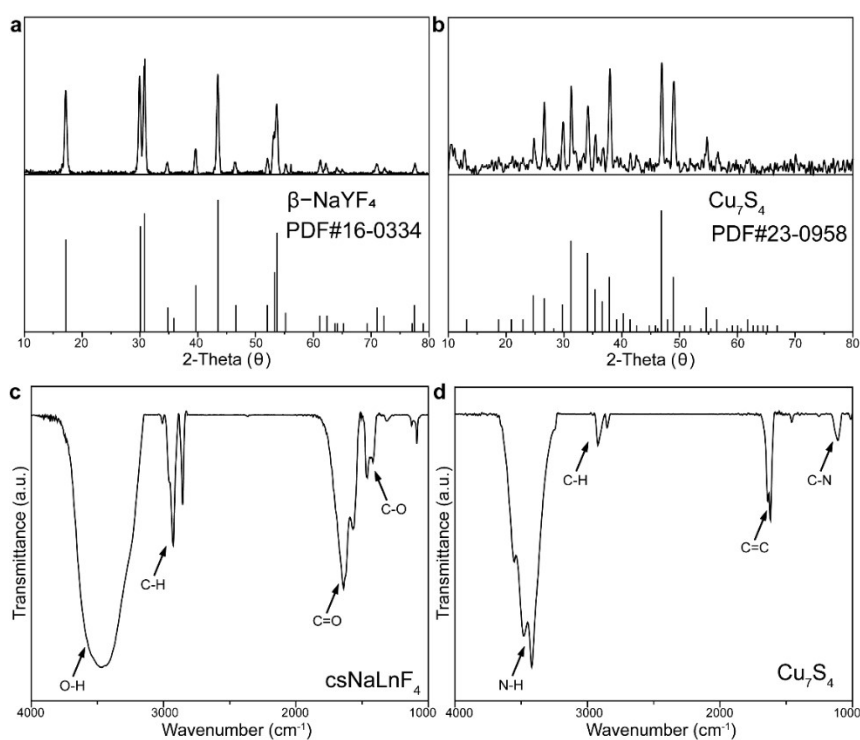

**Figure S2.** X-ray powder diffraction (XRD) patterns of (a) NaYF<sub>4</sub>:20%Yb,2%Er@NaLuF<sub>4</sub> (csNaLnF<sub>4</sub>) and (b) Cu<sub>7</sub>S<sub>4</sub> nanoparticles. Fourier transformed infrared (FTIR) spectra of (c) csNaLnF<sub>4</sub> and (d) Cu<sub>7</sub>S<sub>4</sub> nanoparticles.

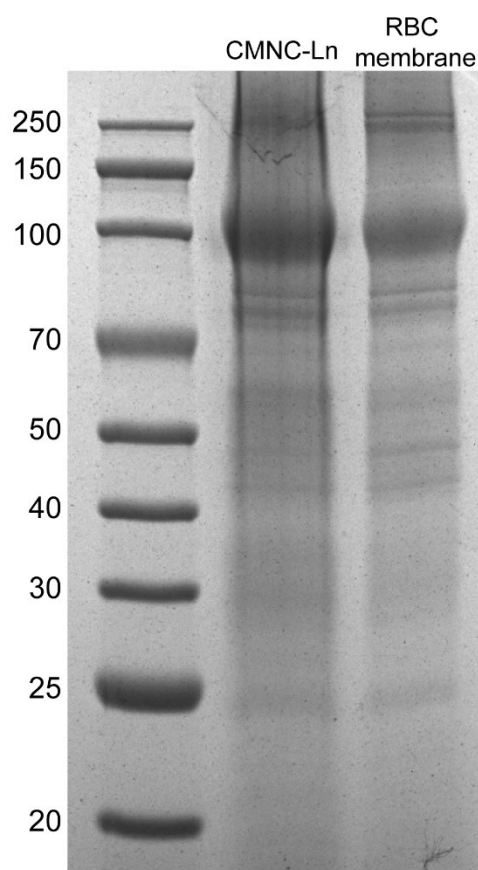

**Figure S3.** SDS-PAGE protein analysis of CMNC-Ln and RBC membrane.

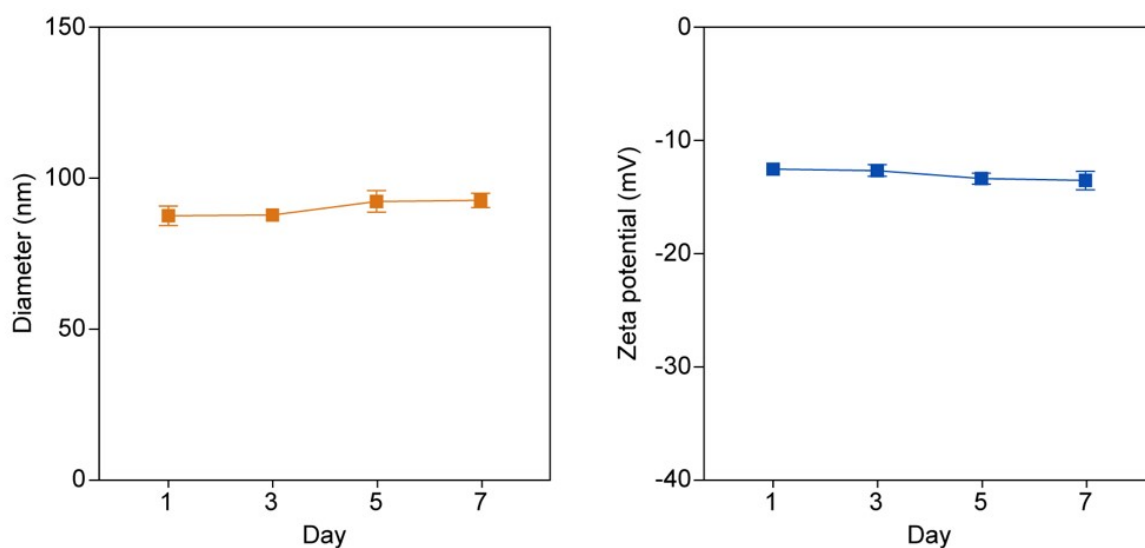

**Figure S4.** Dynamic light scattering (DLS) and Zeta potential analysis of CMNC-Ln in one week after synthesis. Error bar stands for s. d. from  $n = 3$  replicated samples.

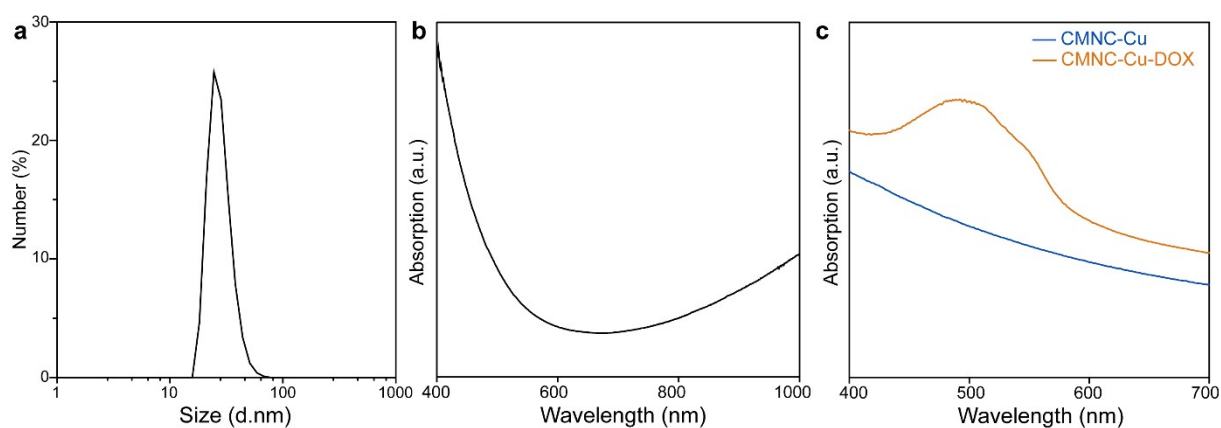

**Figure S5.** (a) Size distribution of  $\text{Cu}_7\text{S}_4$  nanoparticles in tetrahydrofuran. (b) Absorption spectrum of  $\text{Cu}_7\text{S}_4$  nanoparticles. (c) The comparison of the absorption spectra of RBC membrane coated nanocomposite with  $\text{Cu}_7\text{S}_4$  nanoparticles (CMNC-Cu) (before) and after doxorubicin loading (CMNC-Cu-DOX).

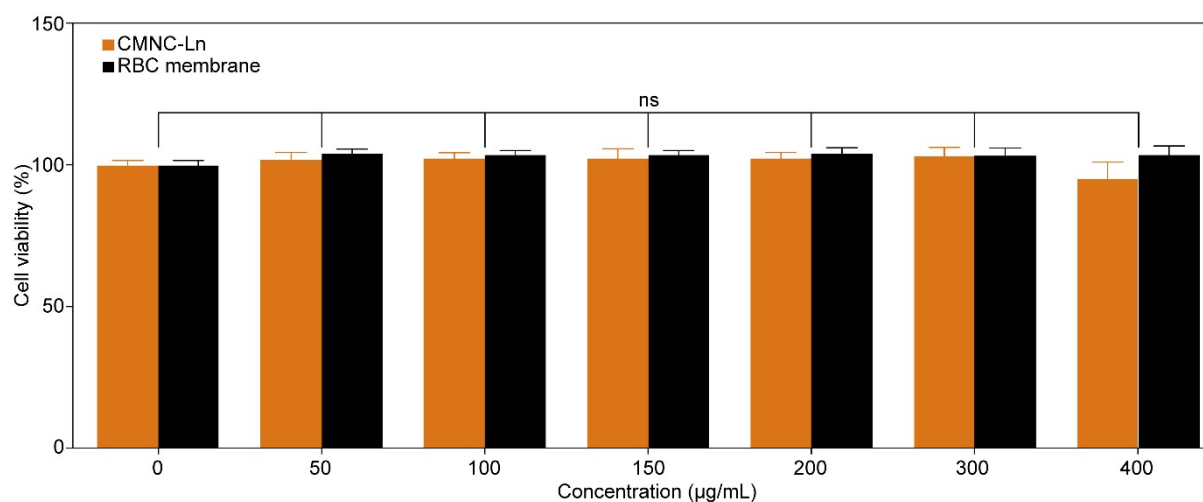

**Figure S6.** Characterizations of cytotoxicity of CMNC-Ln. Cell viability was measured via MTT assay of HEK 293T cells treated with a single nanoparticle and multiple nanoparticles loaded CMNC-Ln at different concentrations (0, 50, 100, 150, 200, 300, 400  $\mu\text{g mL}^{-1}$ ). Cells treated with pure erythrocyte membrane at different concentrations (0, 50, 100, 150, 200, 300, 400  $\mu\text{g mL}^{-1}$ ) was set as control. No significant difference was observed in all groups.

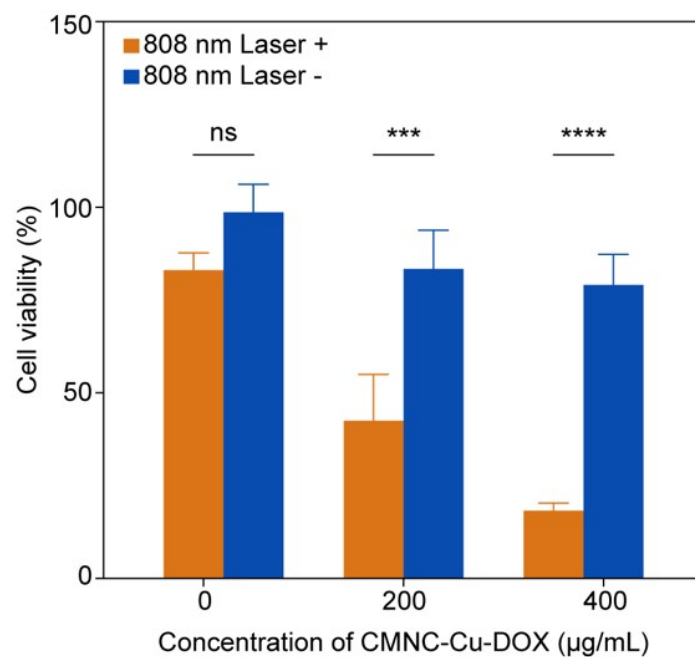

**Figure S7.** Demonstration of *in vitro* anti-tumor treatment efficacy. Cell viability was measured via MTT assay of 4T1 cells treated with CMNC-Cu-DOX at different concentrations (0, 200, 400 µg ml<sup>-1</sup>) and irradiated by a continuous wave 808 nm laser. Cells treated with CMNC-Cu-DOX at different concentrations (0, 200, 400 µg ml<sup>-1</sup>) without irradiation of the laser are set as control.

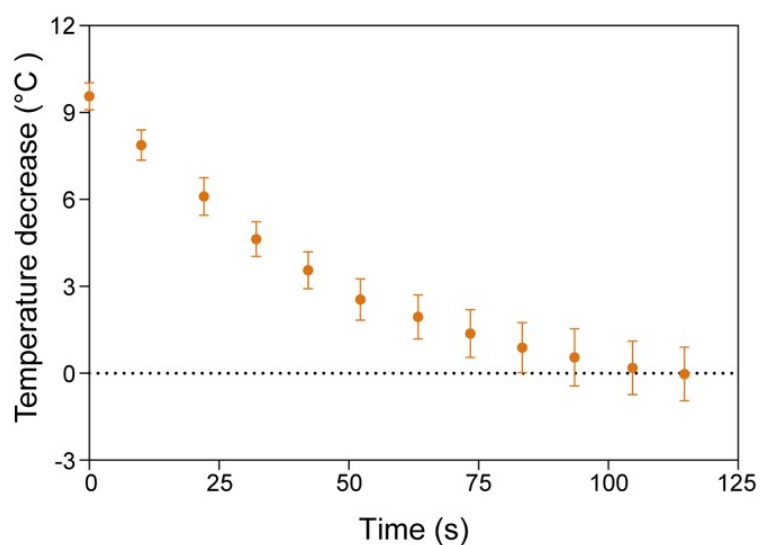

**Figure S8.** Temperature decrease of the mice tumor with CMNC-Cu-DOX injection and irradiation of a 808 nm laser for 30 min. Error bar stands for s. d. from n = 3 replicated samples.

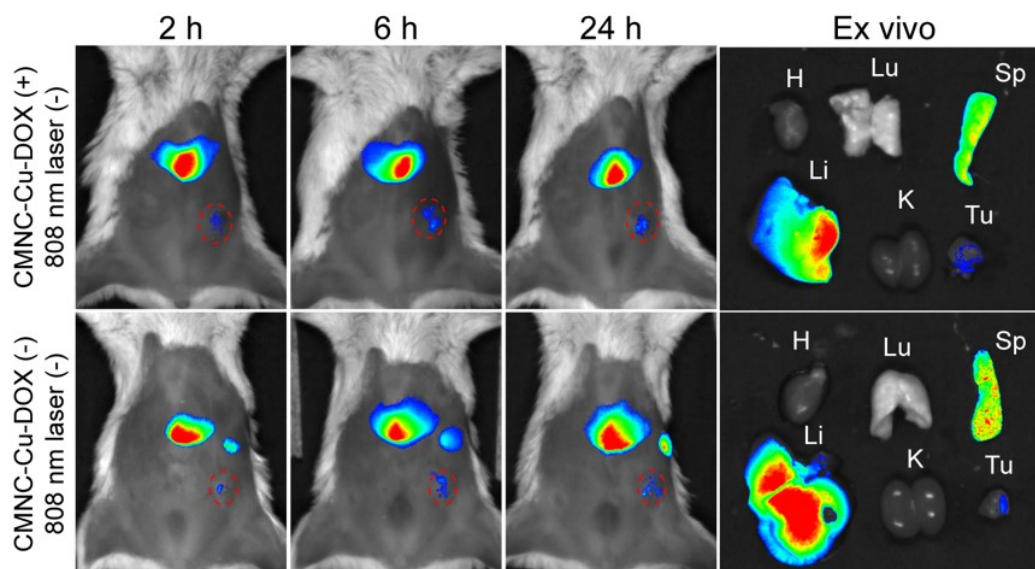

**Figure S9.** Whole body NIR-II imaging of tumor-bearing mouse and the main organs (heart (H), lung (Lu), liver (Li), spleen (Sp), kidney (K) and tumor (Tu)) with only CMNC-Cu-DOX injection or without any treatment. The tumor-bearing mice were injected with CMNC-Ln and the NIR-II luminescence was excited by a 980 nm laser with a 1300 nm long-pass filter. Tumors were marked with red circle.

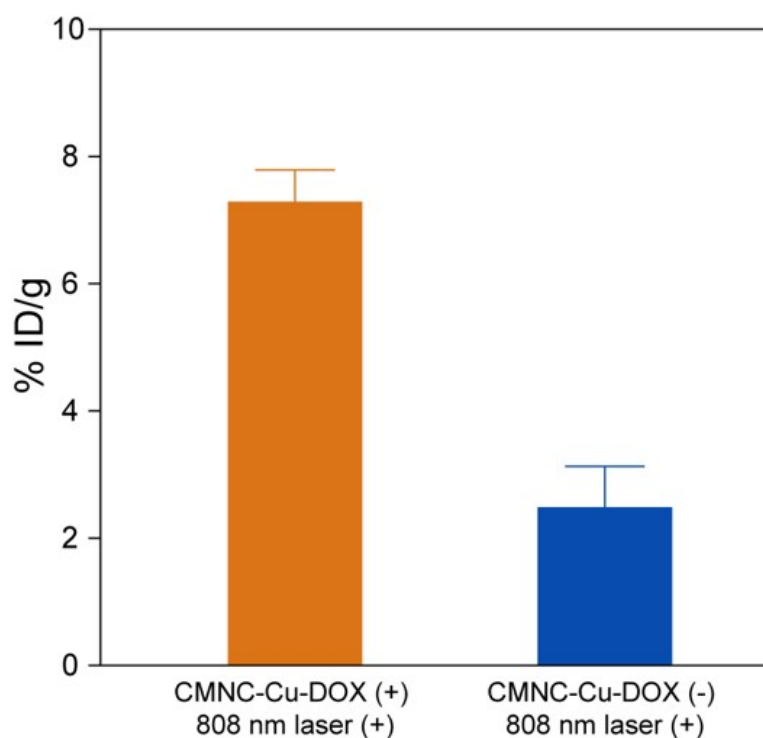

**Figure S10.** Accumulation of CMNC-Ln in the tumors of mice with or without anti-vascular treatment determined by inductively coupled plasma atomic emission spectroscopy (ICP-AES). The quantities of CMNC-Ln in the tumors are shown in percentage injected dose per gram of tissue (%ID/g).

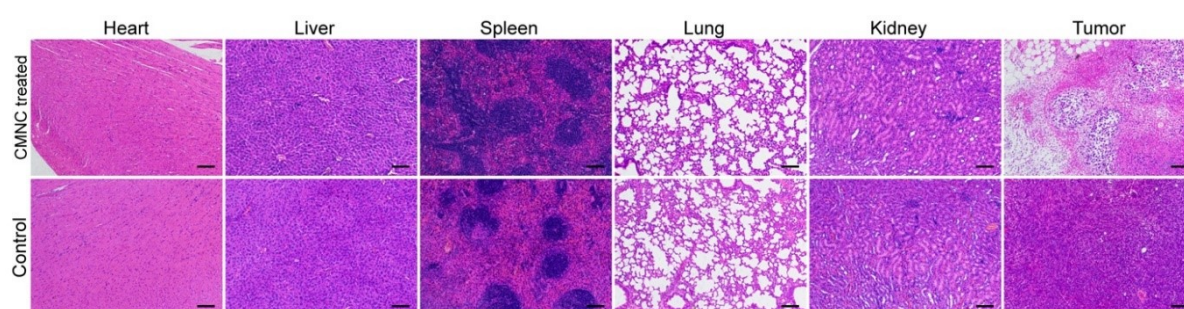

**Figure S11.** Histological analysis in the heart, liver, spleen, lung, kidney and tumor of tumor-bearing mice injected with CMNC-Cu-DOX under an 808 nm laser irradiation. The organs were stained with hematoxylin and eosin (H&E), and scale bars were defined as 100  $\mu$ m.

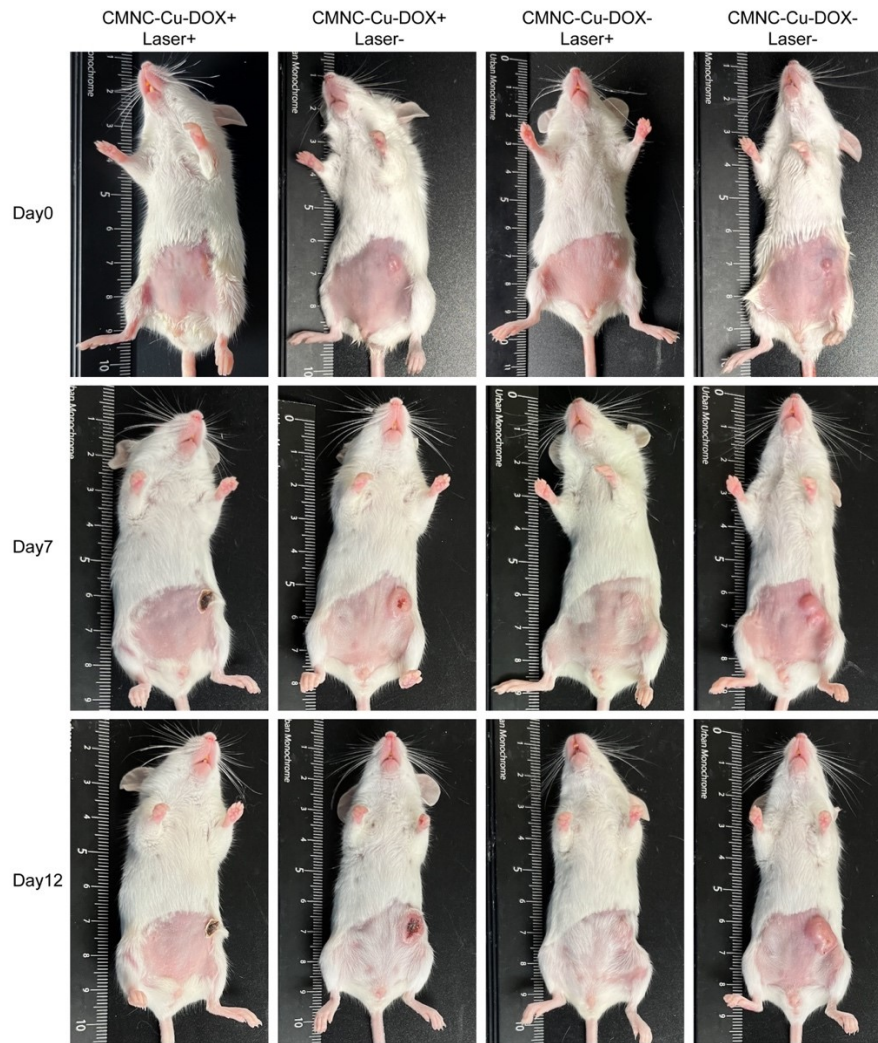

**Figure S12.** Anti-vascular therapy in vivo. Representative photos of tumor-bearing mice in different treatment phases.
